# Supplementary material
Source: ML conference proceedings conference paper supplement (https://openaccess.thecvf.com/content/CVPR2024/html/Lee_Exploiting_Diffusion_Prior_CVPR_2024_paper.html)
Supplement: Supplementary file 1 [file Lee_Exploiting_Diffusion_Prior_CVPR_2024_supplemental.pdf]

# Exploiting Diffusion Prior for Generalizable Dense Prediction

## Supplementary Material

### A. Parametrizations

As described in Section 3.2, we empirically find that parametrizing the U-Net model through estimating  $v$ -prediction [16] performs favorably against predicting inputs or outputs. We detail the formulation of predicting inputs and outputs as follows. The U-Net model  $\hat{x}_\theta$  predicting inputs is fine-tuned with the mean square loss:

$$L = \mathbb{E}_{(x,y),t} [\|x - \hat{x}_\theta(y_t, t)\|_2^2], \quad (1)$$

and the reverse diffusion process is formulated as

$$y_{t-1} = \sqrt{\bar{\alpha}_{t-1}} \left( \frac{y_t - \sqrt{1 - \bar{\alpha}_t} \hat{x}_\theta(y_t, t)}{\sqrt{\bar{\alpha}_t}} \right) + \sqrt{1 - \bar{\alpha}_{t-1}} \hat{x}_\theta(y_t, t) \quad t = [T, \dots, 1], \quad (2)$$

The U-Net model  $\hat{y}_\theta$  predicting outputs is optimized with the loss function:

$$L = \mathbb{E}_{(x,y),t} [\|y - \hat{y}_\theta(y_t, t)\|_2^2], \quad (3)$$

and the reverse diffusion process is

$$y_{t-1} = \sqrt{\bar{\alpha}_{t-1}} \hat{y}_\theta(y_t, t) + \sqrt{1 - \bar{\alpha}_{t-1}} x \quad t = [T, \dots, 1], \quad (4)$$

### B. Additional Experimental Results

#### B.1. Reliability of Off-the-Shelf Estimators

We indicate that the off-the-shelf estimators are not always reliable, especially the approach for intrinsic image decomposition. We demonstrate with the example of albedo estimation in Figure 1 that the off-the-shelf approach generates apparent artifacts in shadow areas, such as corners or floors under beds. The approach fails to recover the correct albedo but instead generates black patches. Consequently, SPADE also learns this pattern, but our model tends to correct artifacts by performing accurate estimation, manifesting the ability of generalization.

#### B.2. Real-World Evaluation

**NYU Depth v2.** Following Ke et al. [6], we evaluate our method on NYU Depth v2 [18] according to the protocol of affine-invariant depth evaluation [13]. We generate prompts with BLIP-2 [7] to use the model trained on synthetic bedroom images. We scale and shift the depth predictions to align ground truths by solving least-square fitting. The comparison against other approaches is shown in Table 1. DMP performs comparably with some previous methods trained with large-scale data.

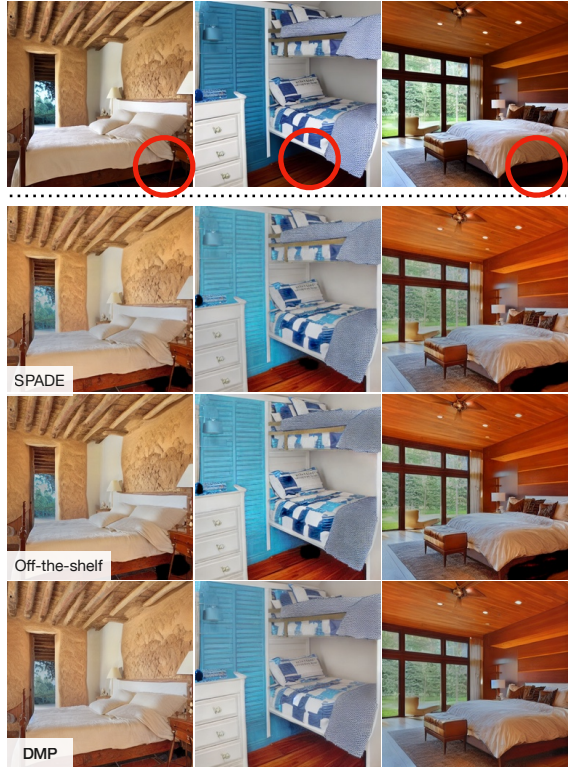

Figure 1. **Qualitative comparisons on albedo estimation.** SPADE [9] and the off-the-shelf approaches generate artifacts in dark areas.

Table 1. Comparison of performance on NYU Depth v2 [18].

|              | # Training Samples |           | NYU v2 |            |
|--------------|--------------------|-----------|--------|------------|
|              | Real               | Synthetic | REL↓   | $\delta$ ↑ |
| MiDaS [13]   | 2M                 | –         | 11.1   | 88.5       |
| Omnidata [3] | 11.9M              | 310K      | 7.4    | 94.5       |
| DPT [12]     | 1.2M               | 188K      | 9.8    | 90.3       |
| Painter [20] | 24K                | –         | 8.0    | 95.0       |
| Marigold [6] | –                  | 74K       | 5.5    | 96.4       |
| DMP          | –                  | 10K       | 12.0   | 86.5       |

**ADE20K.** We also investigate the performance of semantic segmentation with more classes, *e.g.* 150 classes in ADE20K [22]. We follow the encoding strategy proposed by Wang et al. [20] and convert class indices into 3-digit numbers with a  $b$ -base system, which can be represented in the RGB space. However, the performance is unsatisfying (lower than 20% accuracy). With the number of classes increasing, the differences between colors are less distin-

Table 2. Comparison of performance between the subset of ADE20K [22] and the synthesized bedrooms.

|          |                 | Bed  | Pillow | Lamp | Window | Painting | Mean |
|----------|-----------------|------|--------|------|--------|----------|------|
| ADE20K   | Acc $\uparrow$  | 0.88 | 0.36   | 0.57 | 0.76   | 0.74     | 0.66 |
|          | mIoU $\uparrow$ | 0.82 | 0.25   | 0.39 | 0.60   | 0.60     | 0.53 |
| Bedrooms | Acc $\uparrow$  | 0.89 | 0.59   | 0.64 | 0.83   | 0.75     | 0.75 |
|          | mIoU $\uparrow$ | 0.85 | 0.36   | 0.44 | 0.73   | 0.67     | 0.61 |

Table 3. **Analysis of training cross-attention layers and providing text condition.** Both improve the performance of in-domain samples but make little difference in out-of-domain data.

|                  | In-domain       |                  | Out-of-domain   |                  |
|------------------|-----------------|------------------|-----------------|------------------|
|                  | L1 $\downarrow$ | Ang $\downarrow$ | L1 $\downarrow$ | Ang $\downarrow$ |
| Self-attn        | 0.0606          | 0.1290           | 0.0890          | 0.1871           |
| Self-attn + text | 0.0605          | 0.1293           | 0.0876          | <b>0.1844</b>    |
| All attn + text  | <b>0.0514</b>   | <b>0.1156</b>    | <b>0.0872</b>   | 0.1886           |

guishable. The unlabeled areas, which can be simply ignored when calculating loss in the image space, become hard to tackle in the latent space. We leave the application of real-world many-class semantic segmentation for future exploration.

We conduct another analysis with a subset of ADE20K containing only images with beds. The train-test split is constructed by applying the same filtering to the original splits, resulting in 1825 training images and 189 test images. We also generate prompts with BLIP-2. The results are presented in Table 2. The performance across real and synthetic domains is similar, especially for large items.

### B.3. Additional Ablation Study

**Modeling.** We vary the trainable layers and the presence of text conditions when fine-tuning the model. Since the example tasks we choose in this work are not directly conditional on text, providing text descriptions might not be necessary. Accordingly, training cross-attention layers is optional. Table 3 shows that text condition and training cross-attention layers help improve the performance of in-domain samples, but the difference in out-of-domain samples is unnoticeable between the settings. This result suggests that we can adopt curated real ground truth datasets without text descriptions for training at the expense of a subtle performance drop. Alternatively, we can generate prompts with image captioning [7], which may lead to better performance.

**Size of Training Data.** We analyze the effect of varying the size of training data. We compare fine-tuning the model for normal estimation with 100, 1K, 10K, and 100K generated bedroom images. As shown in Figure 2, increasing

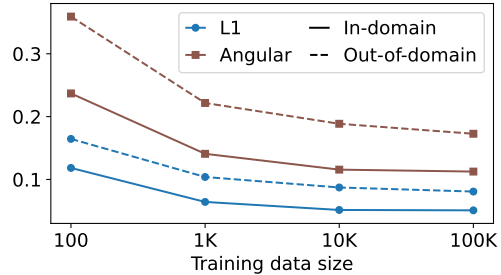

Figure 2. Quantitative performance of normal estimation with different sizes of training data.

Table 4. NYU Depth v2 [18] performance comparison of models trained with real and pseudo ground truths.

| Dataset       | Ground Truth | REL $\downarrow$ | $\delta$ $\uparrow$ |
|---------------|--------------|------------------|---------------------|
| Hypersim [14] | Real         | 13.0             | 85.0                |
| Bedrooms      | Pseudo       | 12.0             | 86.5                |

data size over 10K improves little performance, so we conduct the other experiments with 10K training images.

**Quality of Training Data.** We examine the influence of data quality by comparing the models trained with real and pseudo ground truth. We use Hypersim [14] as the real ground truth and evaluate the models with NYU Depth v2 [18]. Table 4 shows that there is no significant difference between the two models. The model trained with pseudo ground truth even performs slightly better. We speculate that the data diversity may be an important factor. While Hypersim contains more than 70K images, the images are collected from only 461 scenes. Many of them are variations of camera views and distances. In contrast, the synthetic images, while all of them are bedrooms, are all distinct scenes, which present diverse compositions of objects.

**Blending Inputs and Outputs.** IADB [4] proposes a deterministic framework where the diffusion process is formulated as a series of interpolations between observations and noise. Although their training strategy produces deterministic mapping of observations and noise, the correlation between observation and noise in each pair is stochastic due to unpaired sampling during training. We analyze the applicability of this framework to deterministic dense prediction problems by sampling paired inputs and outputs and fine-tuning from a pre-trained T2I diffusion model. With such adaptation, the differences between their framework and our approach are only the variance schedule and parametrization, where the importance weight of inputs linearly rises through the diffusion process, and the U-Net predicts  $y - x$ .

Table 5 shows the comparison between DMP and IADB

Table 5. Comparisons with IADB [4] and Poission blending [11] on surface normal estimation.

|               | In-domain     |               | Out-of-domain |               |
|---------------|---------------|---------------|---------------|---------------|
|               | L1↓           | Ang↓          | L1↓           | Ang↓          |
| IADB [4]      | 0.0675        | 0.1416        | 0.0974        | 0.2017        |
| Poission [11] | 0.0868        | 0.1888        | 0.1201        | 0.2623        |
| DMP           | <b>0.0514</b> | <b>0.1156</b> | <b>0.0872</b> | <b>0.1886</b> |

Table 6. Comparisons with IADB [4] on depth estimation.

|          | In-domain     |                   |               | Out-of-domain |                   |               |
|----------|---------------|-------------------|---------------|---------------|-------------------|---------------|
|          | REL↓          | $\delta \uparrow$ | RMSE↓         | REL↓          | $\delta \uparrow$ | RMSE↓         |
| IADB [4] | 0.3099        | 0.4982            | 0.1165        | 0.5049        | 0.3132            | 0.1467        |
| DMP      | <b>0.1072</b> | <b>0.8861</b>     | <b>0.1020</b> | <b>0.2117</b> | <b>0.6395</b>     | <b>0.1360</b> |

on surface normal estimation, and Table 6 is the result of depth estimation. Figure 3 demonstrates that the images generated by the model fine-tuned through IADB have noise and inaccurate predictions.

In addition to  $\alpha$ -blending used by DMP and IADB, we investigate the effect of an advanced blending strategy, Poission blending [11], which blends source and target images by solving a least-square fitting while reserving the gradient of source images. We assume image gradients are meaningful in the latent space. The diffusion process is viewed as increasing the intensity of the mask for selection editing. We adopt an off-the-shelf PyTorch implementation [2]. The performance on surface normal estimation is shown in Table 5, and the example outputs in Figure 3 show that the image quality is unsatisfying.

#### B.4. Additional Comparison

**ControlNet.** ControlNet [21] proposes a conditional text-to-image framework with additional control, such as edges or human poses, which constrains structures and layouts of output images. Since it is also an image-to-image generative model, we train it to take input images as control and output estimations. The performance of estimating 3D properties and intrinsic images is presented in Table 7, and the segmentation results are shown in Table 8. It demonstrates weaker generalizability than our approach.

In addition, we analyze the influence of varying initial noise in Figure 4. While the rough structures of the images are controlled by the input images, the initial noise alters the details of estimations. This variation is not tolerated for dense prediction.

**Palette.** Besides training GAN-based generative models from scratch and fine-tuning pre-trained diffusion models with the approaches listed in Section 4.1, we addition-

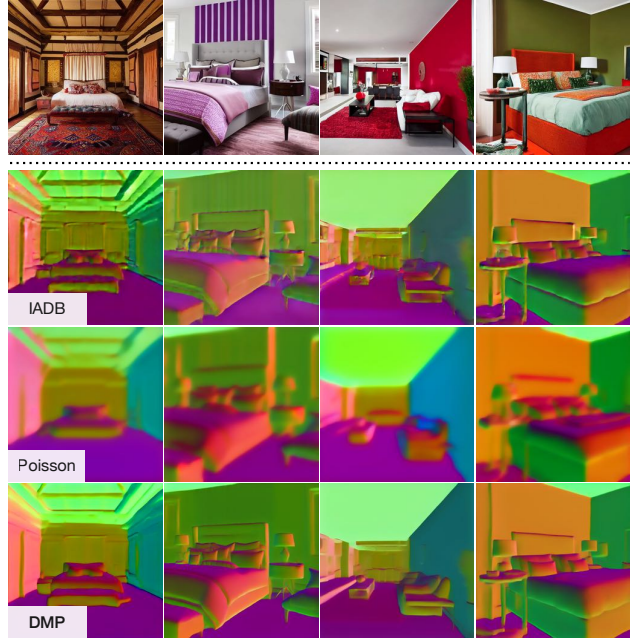

Figure 3. Qualitative comparisons between different blending frameworks.

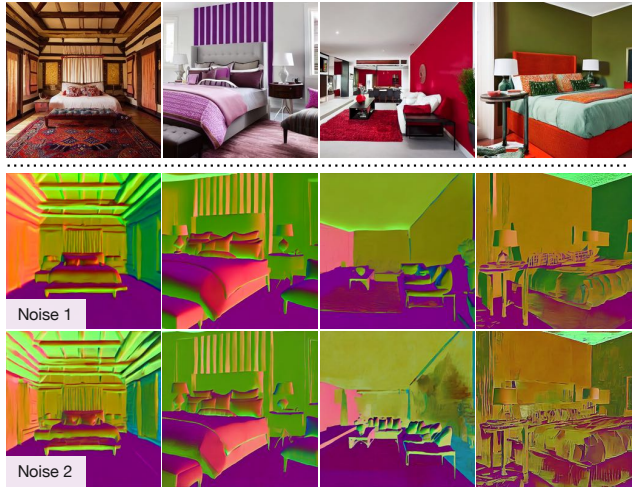

Figure 4. Results of ControlNet with different initial noise. The outputs are not deterministic.

ally include training an image-to-image diffusion model from scratch for comparison. Following the design of Palette [15], we expand the input layers of the U-Net to encode the concatenation of input and output images, with the U-Net parameterized to predict noise. The same autoencoder in the pre-trained diffusion model is also adopted. The performance is shown in Table 7 and Table 8, which indicates the inability of this approach to handle categorical label maps.

Table 7. Quantitative comparisons with ControlNet [21] and Palette [15] on 3D property estimation and intrinsic image decomposition.

|                 | Normal        |               |               |               | Depth         |               |               |               |               |               | Albedo        |               | Shading       |               |
|-----------------|---------------|---------------|---------------|---------------|---------------|---------------|---------------|---------------|---------------|---------------|---------------|---------------|---------------|---------------|
|                 | In            |               | Out           |               | In            |               | Out           |               | In            |               | Out           |               | In            | Out           |
|                 | L1↓           | Ang↓          | L1↓           | Ang↓          | REL↓          | $\delta$ ↑    | RMSE↓         | REL↓          | $\delta$ ↑    | RMSE↓         | MSE↓          | MSE↓          |               |               |
| ControlNet [21] | 0.1021        | 0.2216        | 0.1862        | 0.4032        | 0.1739        | 0.7681        | 0.1287        | 0.4398        | 0.4004        | 0.2253        | 0.0302        | 0.0402        | 0.0265        | 0.0336        |
| Palette [15]    | 0.1643        | 0.3642        | 0.1881        | 0.4160        | 0.6889        | 0.2626        | 0.3604        | 1.0535        | 0.2270        | 0.4203        | 0.0203        | 0.0199        | 0.0304        | 0.0260        |
| DMP             | <b>0.0514</b> | <b>0.1156</b> | <b>0.0872</b> | <b>0.1886</b> | <b>0.1072</b> | <b>0.8861</b> | <b>0.0041</b> | <b>0.2117</b> | <b>0.6395</b> | <b>0.1360</b> | <b>0.0051</b> | <b>0.0064</b> | <b>0.1020</b> | <b>0.0070</b> |

Table 8. Quantitative comparisons with ControlNet [21] and Palette [15] on semantic segmentation.

|                 | Bed           |               | Pillow        |               | Lamp          |               | Window        |               | Painting      |               | Mean          |               |
|-----------------|---------------|---------------|---------------|---------------|---------------|---------------|---------------|---------------|---------------|---------------|---------------|---------------|
|                 | Acc↑          | mIoU↑         |
| ControlNet [21] | 0.5215        | 0.4820        | 0.3540        | 0.1436        | 0.4275        | 0.2936        | 0.4999        | 0.4190        | 0.3823        | 0.3257        | 0.4370        | 0.3328        |
| Palette [15]    | 0.0347        | 0.0329        | 0.0019        | 0.0018        | 0.0013        | 0.0012        | 0.0119        | 0.0119        | 0.0005        | 0.0005        | 0.0101        | 0.0097        |
| DMP             | <b>0.8947</b> | <b>0.8506</b> | <b>0.5871</b> | <b>0.3645</b> | <b>0.6399</b> | <b>0.4414</b> | <b>0.8338</b> | <b>0.7335</b> | <b>0.7490</b> | <b>0.6735</b> | <b>0.7409</b> | <b>0.6127</b> |

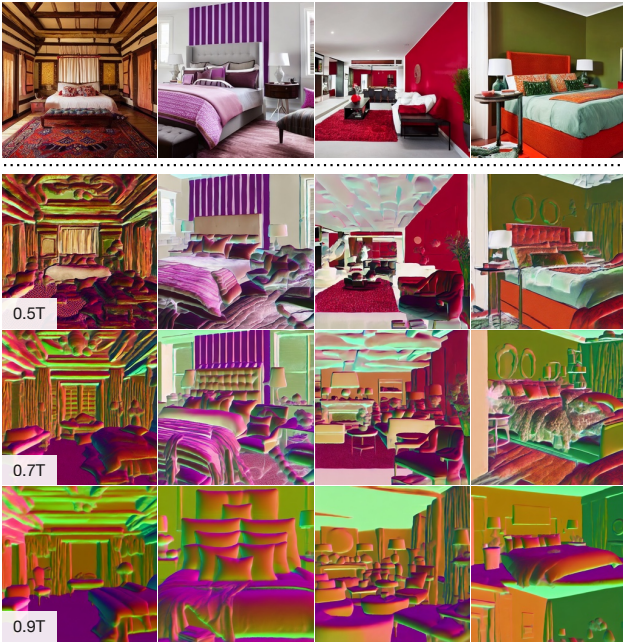

Figure 5. Qualitative comparisons of SDEdit with starting from different time steps. A trade-off exists between the effect of style transfer and content preservation.

## B.5. Improving Compared Methods

Since the results of GAN-based generative models consistently outperform diffusion-based models in our experiments, we seek performance enhancement for diffusion-based approaches. All experiments are conducted on in-domain surface normal estimation.

Table 9. Quantitative comparisons on in-domain surface normal estimation between different timesteps where the generation process of SDEdit starts. The performance improves at the expense of deviation from input image contents.

| Step | L1↓    | Ang↓   |
|------|--------|--------|
| 0.5T | 0.2897 | 0.5336 |
| 0.7T | 0.2599 | 0.5087 |
| 0.9T | 0.2059 | 0.4568 |

Table 10. Quantitative comparisons on in-domain surface normal estimation between DDIB and DDIB with Plug-and-Play (PnP). The feature injection regulates the generated contents while improving performance.

| Variants   | L1↓    | Ang↓   |
|------------|--------|--------|
| DDIB       | 0.1849 | 0.4210 |
| DDIB + PnP | 0.1652 | 0.3634 |

**SDEdit.** The time steps from which the generation process of SDEdit starts can be seen as the strength of preserving the contents of input images. We show in Figure 5 that generating from step 0.5T produces images with similar contents to the input images, while from step 0.9T results in plausible estimation of surface normals, but the image contents are disrupted, despite achieving the best performance in quantitative evaluation reported in Table 9. This issue has long been understood as a trade-off between the effect of style transfer and content preservation in image-to-image literature [5, 8], but for deterministic dense prediction problems considered in this work, such a trade-off is not permitted.

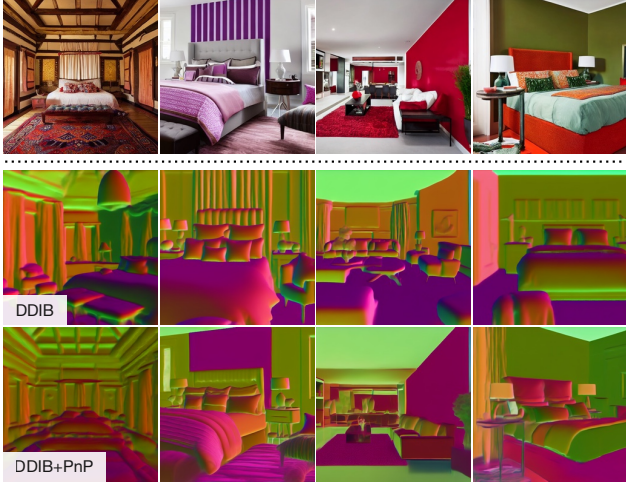

Figure 6. **Qualitative comparisons between DDIB and DDIB with Plug-and-Play (PnP)**. The image contents are reserved but not consistent with accurate normals.

Table 11. **Quantitative comparisons on in-domain surface normal estimation between different training tokens of IP2P (learned)**. The increased number of tokens does not guarantee improved performance.

| #Tokens | L1↓    | Ang↓   |
|---------|--------|--------|
| 1       | 0.3550 | 0.7181 |
| 2       | 0.3470 | 0.7790 |
| 4       | 0.3274 | 0.6384 |

**DDIB.** As presented in Appendix B.7, DDIB is capable of generating images that are likely sampled from output distributions, but the contents and geometry of output results are not consistent with input images. We explore the approach to content consistency by adopting feature constraints proposed by Plug-and-Play (PnP) [19] for image-to-image translation, which injects the self-attention and convolution features of input images into output images. As shown in Figure 6 and Table 10, the structures and contents of output images of DDIB with PnP constraints highly resemble the input images, but the estimated normals remain inaccurate despite better quantitative performance.

**IP2P.** We analyze the expressiveness of inverted tokens by varying the number of training tokens in IP2P (learned). While the performance is slightly improved in one metric of quantitative evaluation, shown in Table 11, Figure 7 reveals that the differences between the estimated results are not significant.

### B.6. Failure Cases

We demonstrate some examples of failure cases in Figure 8 for surface normal estimation, Figure 9 for depth estimation,

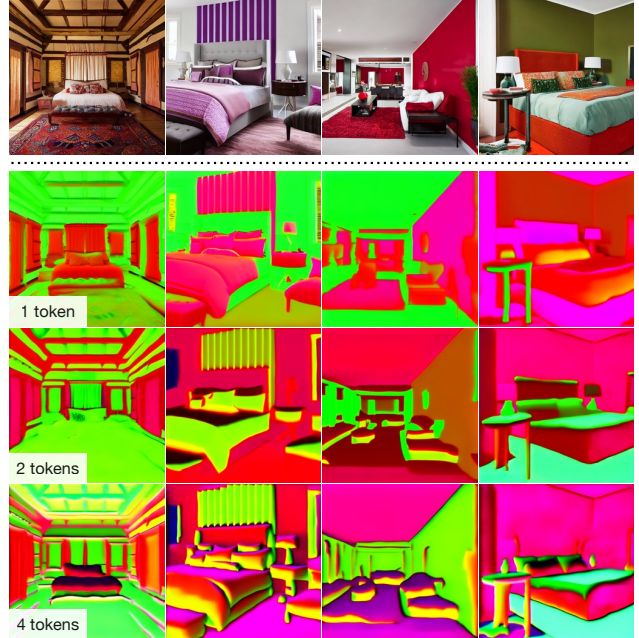

Figure 7. Qualitative comparisons of IP2P with different training tokens.

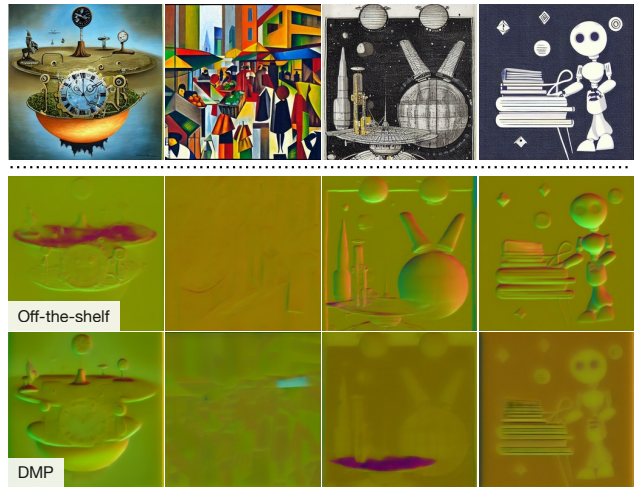

Figure 8. Failure cases of surface normal estimation.

and Figure 10 for semantic segmentation, where off-the-shelf approaches might provide more accurate prediction than our method.

### B.7. Results of Compared Methods

We show the example images generated by the compared methods listed in Section 4.1. The results of surface normal estimation are in Figure 11, with depths in Figure 12, albedo in Figure 13, shading in Figure 14, and semantic segmentation in Figure 15.

Table 12. **Style templates**, where {} is replaced by original prompts.

- anime artwork, {} . anime style, key visual, vibrant, studio anime, highly detailed
- concept art, {} . digital artwork, illustrative, painterly, matte painting, highly detailed
- comic, {} . graphic illustration, comic art, graphic novel art, vibrant, highly detailed
- neonpunk style, {} . cyberpunk, vaporwave, neon, vibes, vibrant, stunningly beautiful, crisp, detailed, sleek, ultramodern, magenta highlights, dark purple shadows, high contrast, cinematic, ultra-detailed, intricate, professional
- surrealist art, {} . dreamlike, mysterious, provocative, symbolic, intricate, detailed
- abstract style, {} . non-representational, colors and shapes, expression of feelings, imaginative, highly detailed
- art deco style, {} . geometric shapes, bold colors, luxurious, elegant, decorative, symmetrical, ornate, detailed
- vaporwave style, {} . retro aesthetic, cyberpunk, vibrant, neon colors, vintage 80s and 90s style, highly detailed

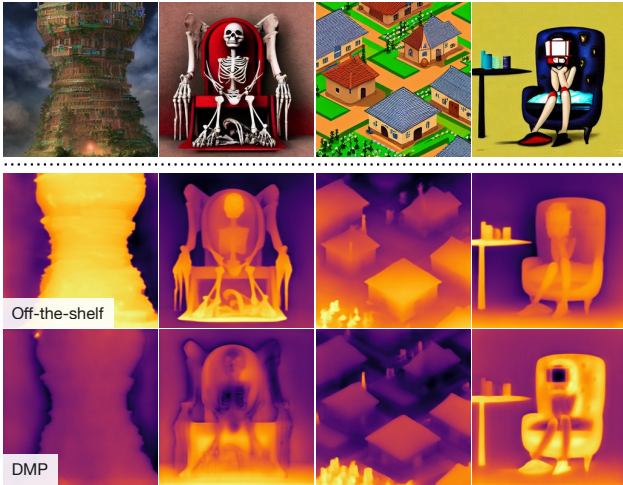

Figure 9. Failure cases of depth estimation.

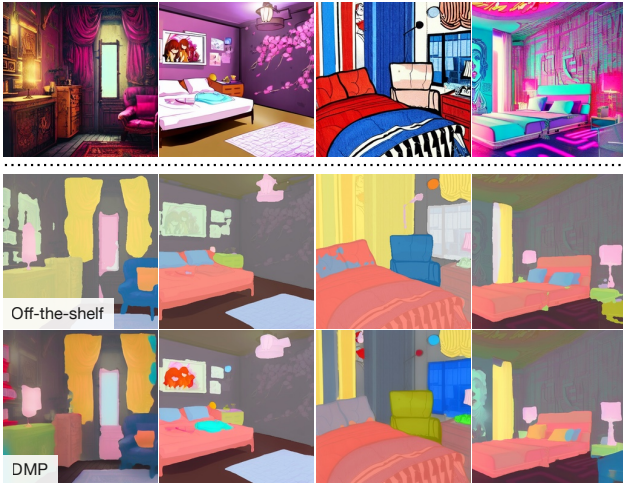

Figure 10. Failure cases of semantic segmentation.

## C. Implementation Details

**Model Architecture and Optimization.** We use Stable Diffusion 1.4 as the pre-trained text-to-image model and adapt it with rank = 4 for LoRA. We fine-tune the model for 50K steps with batch size 8 and learning rate 0.0001 with a cosine decay schedule. The training takes around 14 hours with a single NVIDIA RTX 3090.

**Generating Images.** We generate the training and test images by first generating a set of prompts with a large language model. The prompt for the language model is a template adapted from pix2pix-zero [10], where different scene keywords are filled in. The template is

“Provide a caption for a photo of a *scene*. The caption should contain many adjectives, should describe colors, styles, lighting and materials in the photo, should be in English and should be no longer than 150 characters. Caption:”.

The placeholder *scene* is replaced by “bedroom” for training images and in-domain test images. To generate out-of-domain test images for estimating 3D properties and intrinsic images, it is replaced by uniform sampling from the keywords in Table 13.

Out-of-domain test images for segmentation are synthesized by varying the image styles of in-domain test images, for semantic categories should remain the same across training and test images. The prompts regulating the styles are listed in Table 12 borrowed from an online post [1].

## D. Applications

Surface normals and depths facilitate many vision tasks. We show by the examples of 3D photo inpainting [17] that precise depths improve 3D reconstruction from 2D images. Compared to the default depth estimator [13], the resulting videos produced with the depth maps generated by our approach have more accurate depth relationships between the objects. Please refer to the project website for visual demonstrations.

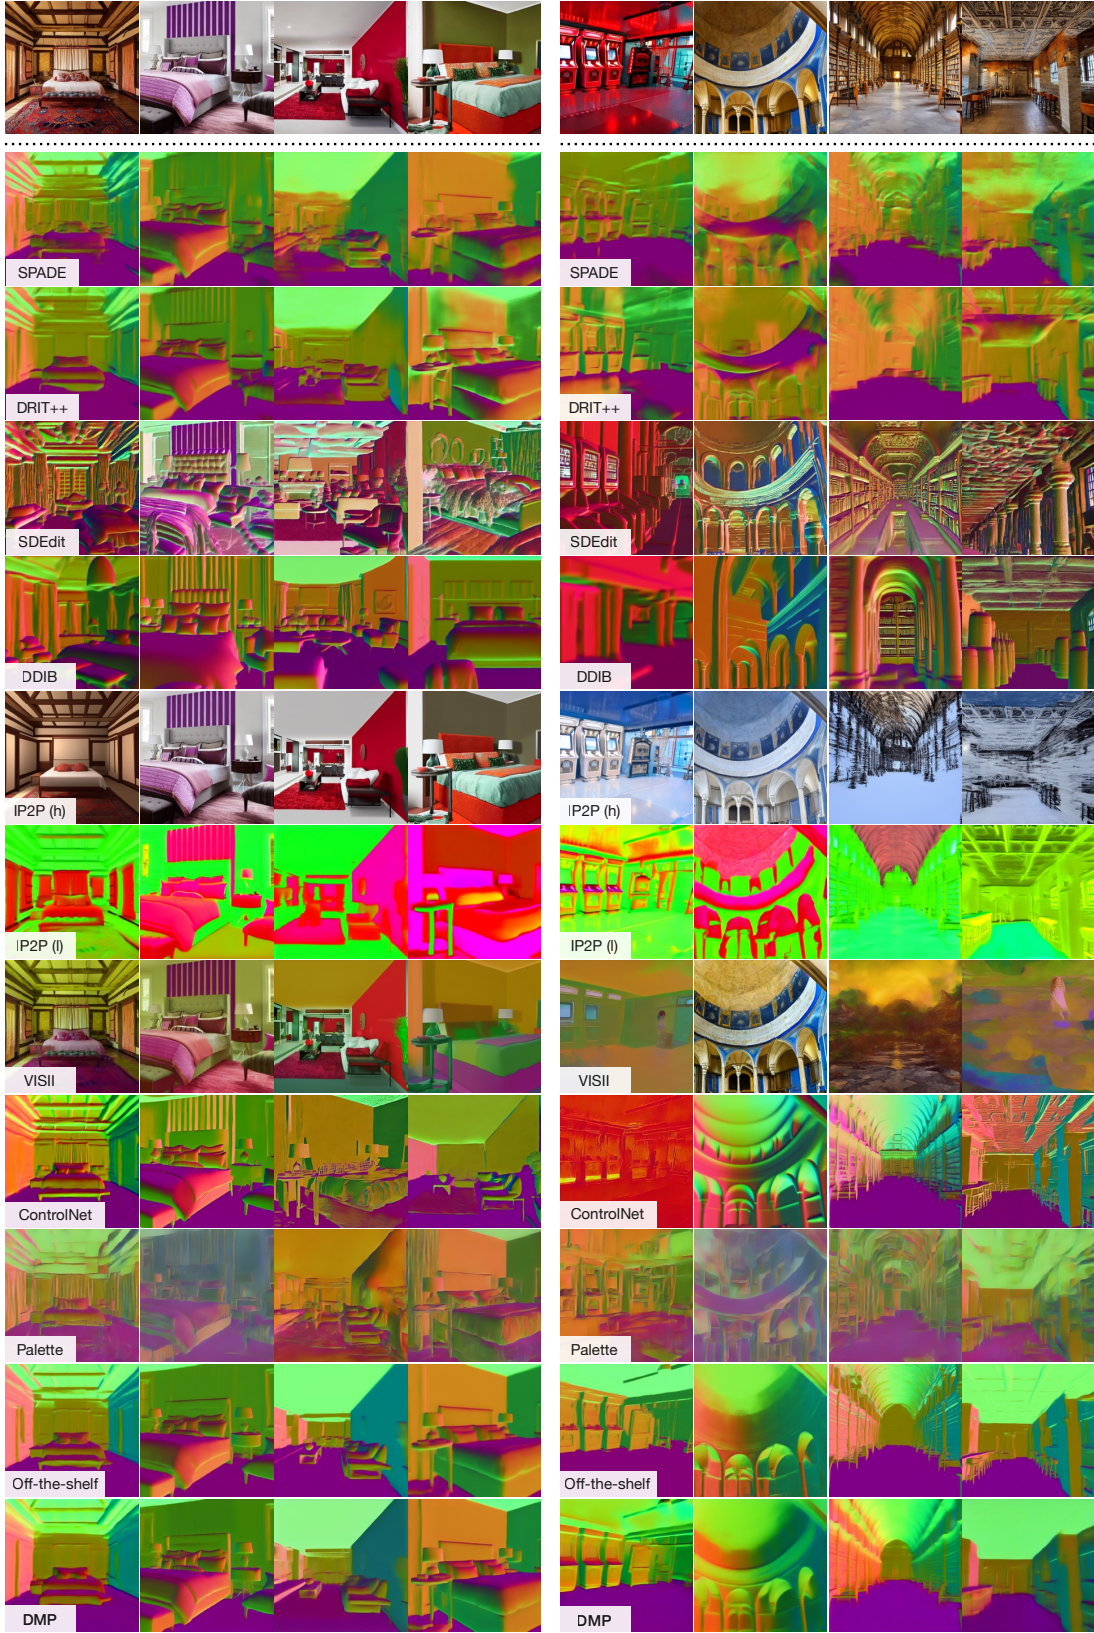

(a) In-domain

(b) Out-of-domain

Figure 11. Qualitative results of compared methods on surface normal estimation.

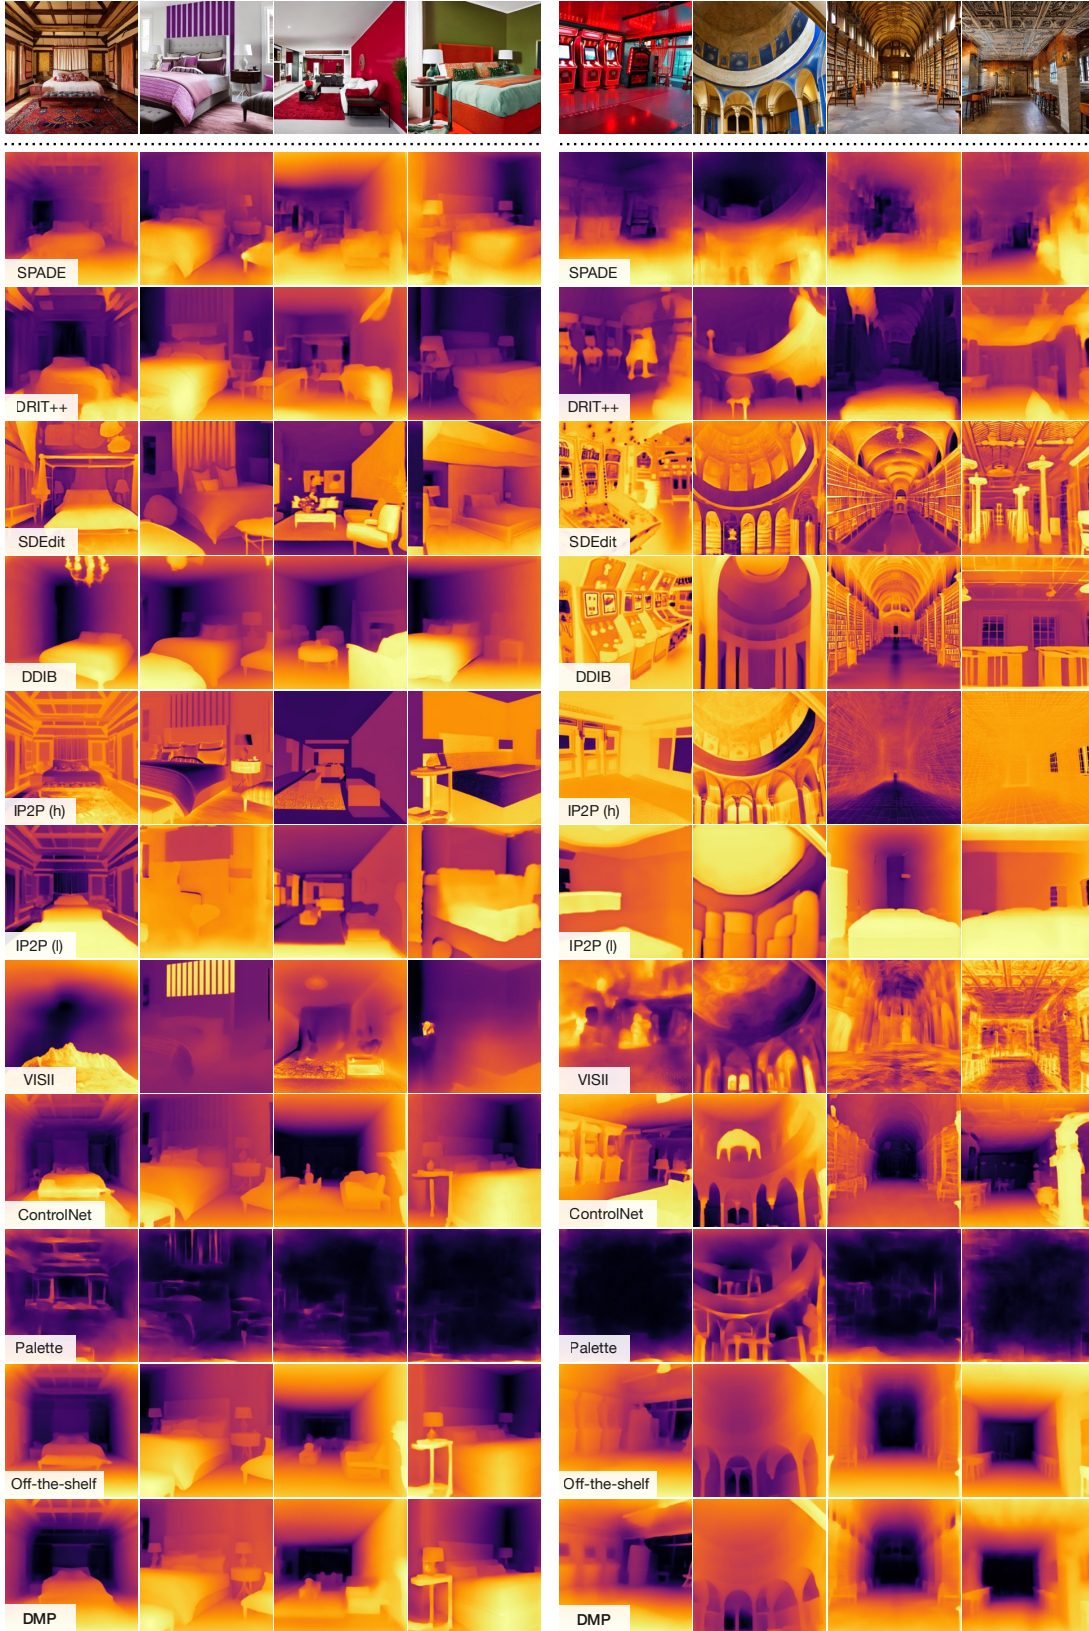

(a) In-domain

(b) Out-of-domain

Figure 12. Qualitative results of compared methods on depth estimation.



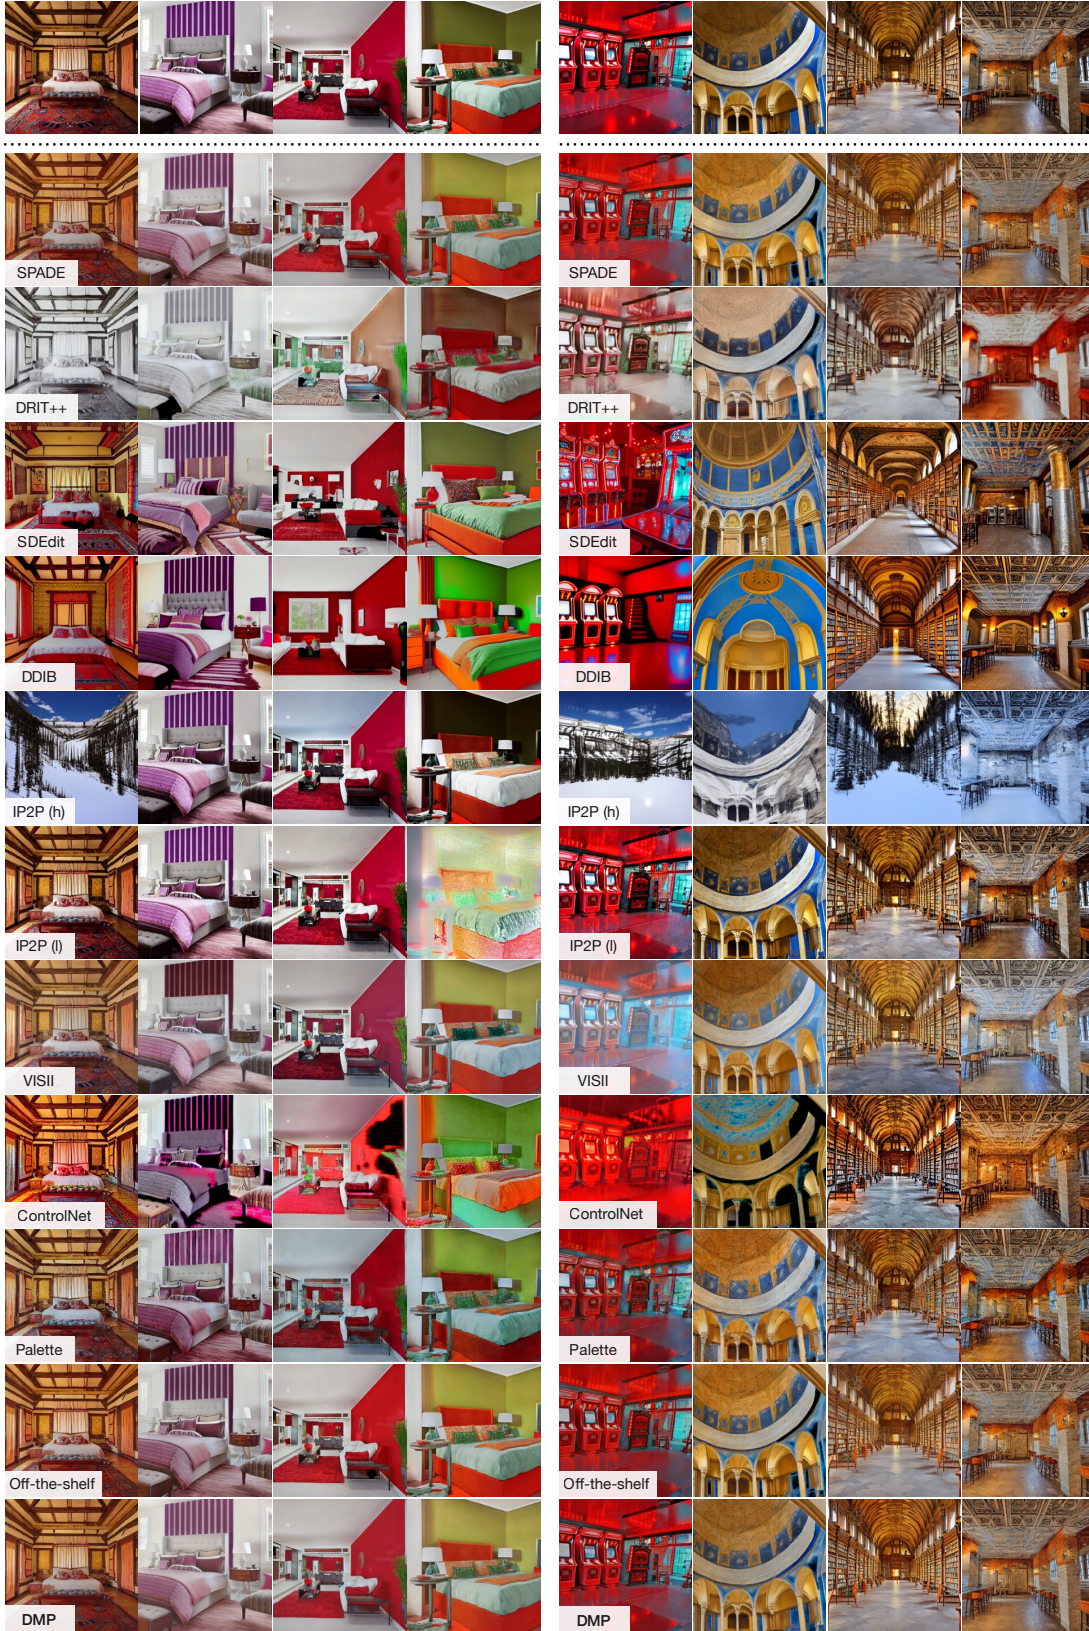

(a) In-domain (b) Out-of-domain  
 Figure 13. Qualitative results of compared methods on albedo estimation.

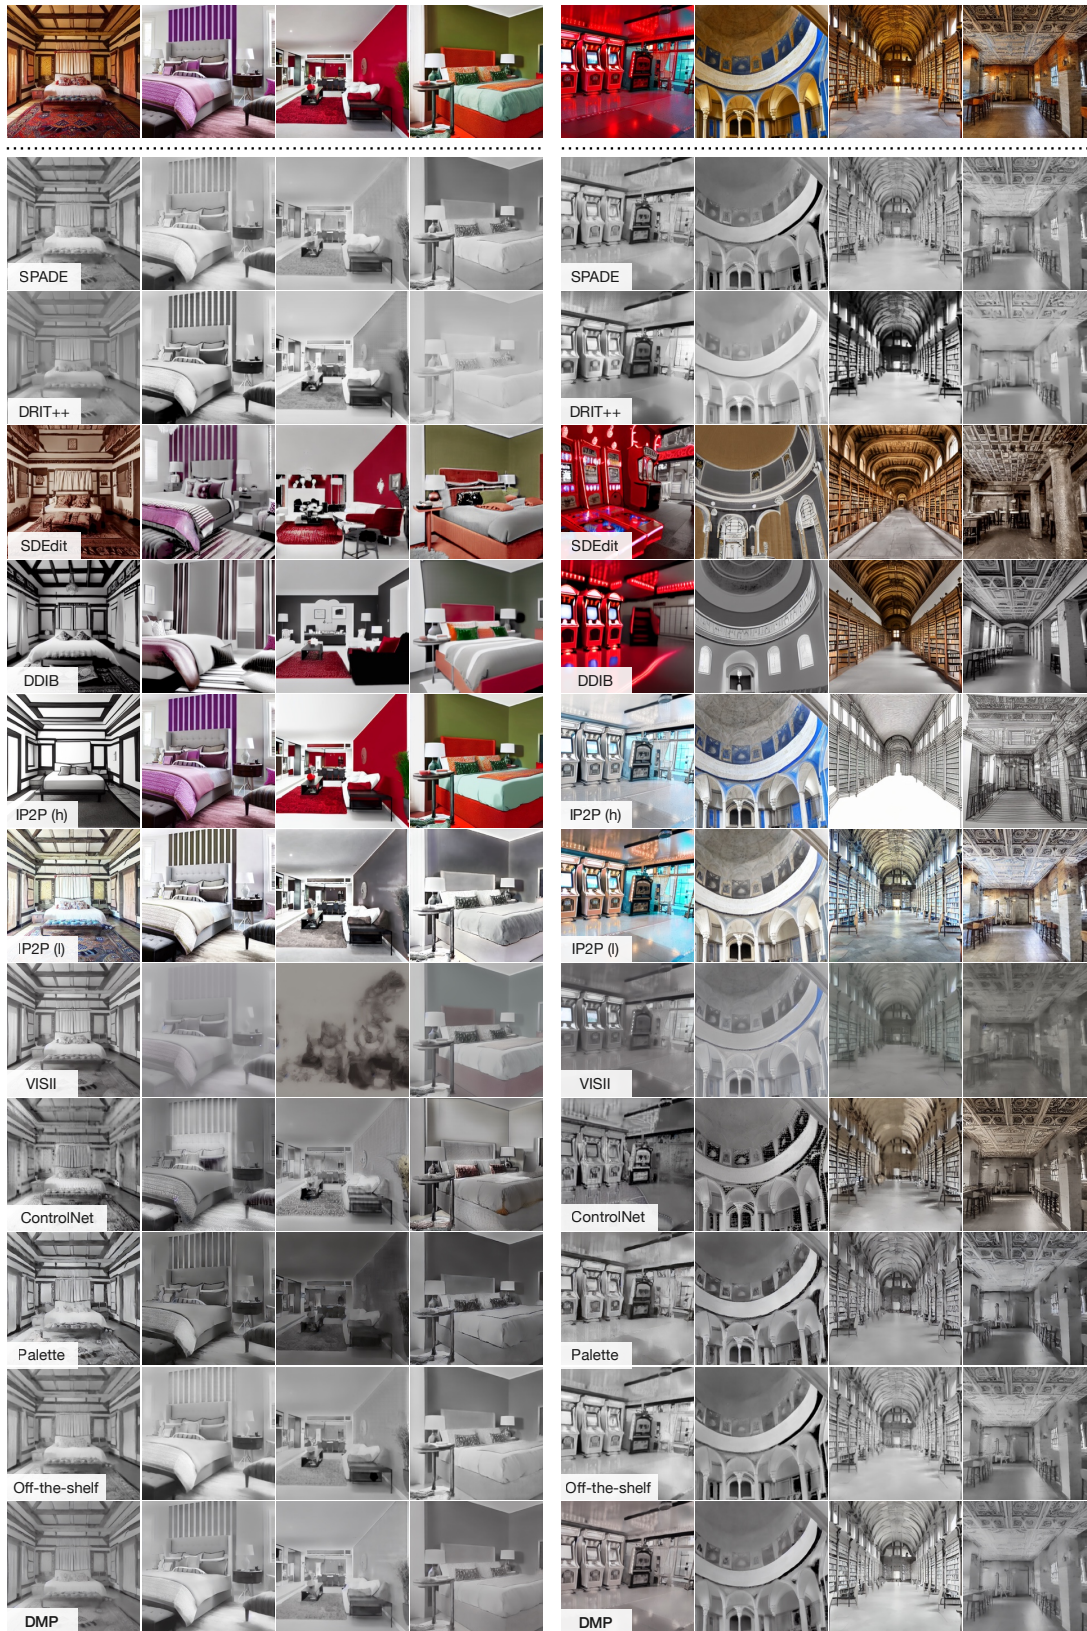

(a) In-domain

(b) Out-of-domain

Figure 14. Qualitative results of compared methods on shading estimation.

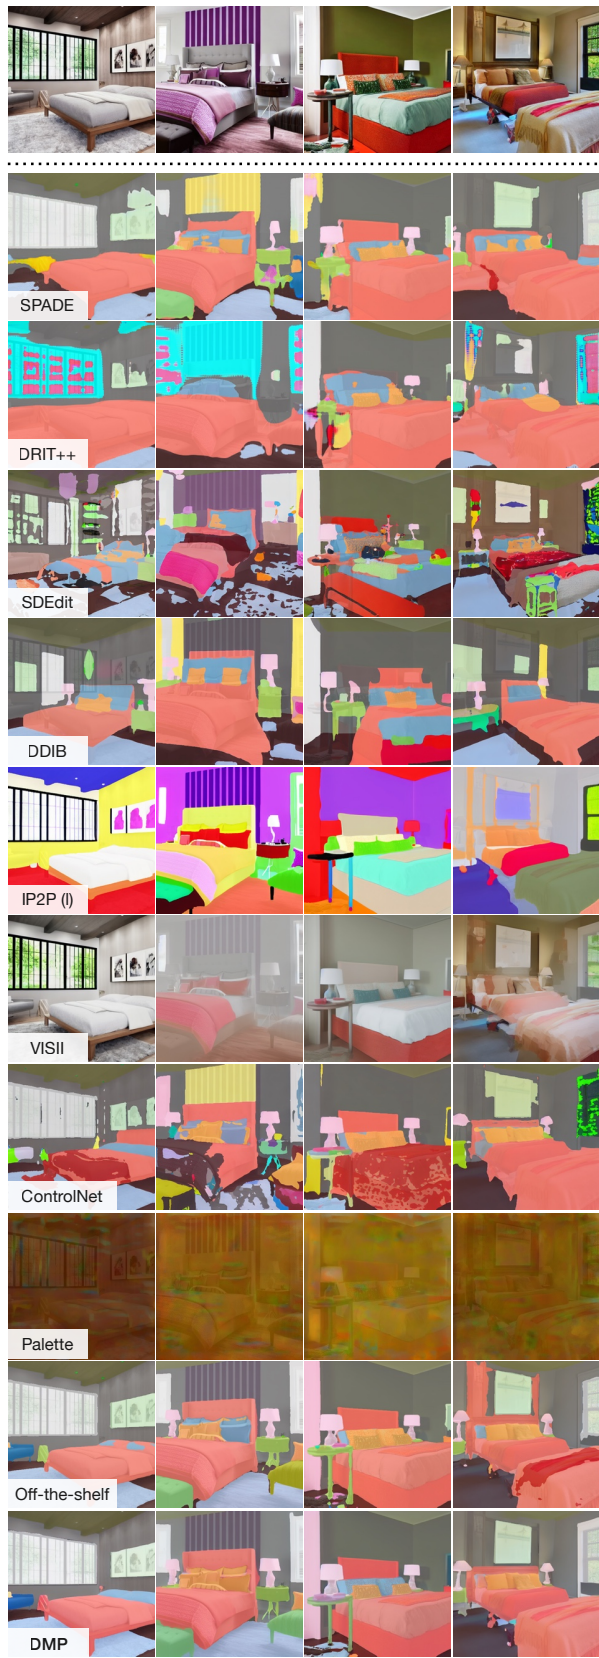

Figure 15. Qualitative results of compared methods on semantic segmentation.

Table 13. **Scenes categories** of out-of-domain images.

|                          |                         |                         |                          |
|--------------------------|-------------------------|-------------------------|--------------------------|
| airlock                  | airplane cabin          | airport terminal        | airport ticket counter   |
| alcove                   | amusement arcade        | anechoic chamber        | indoor apse              |
| aquarium                 | arcade                  | archive                 | armory                   |
| indoor arrival gate      | art gallery             | art school              | art studio               |
| artists loft             | assembly line           | indoor athletic field   | attic                    |
| auditorium               | auto factory            | indoor auto mechanics   | auto showroom            |
| backstage                | indoor badminton court  | baggage claim           | ball pit                 |
| ballroom                 | indoor bank             | bank vault              | banquet hall             |
| indoor baptistry         | bar                     | barbershop              | barrack                  |
| basement                 | indoor basketball court | bathhouse               | bathroom                 |
| indoor batting cage      | indoor bazaar           | beauty salon            | bedchamber               |
| bedroom                  | beer hall               | belfry                  | bell foundry             |
| berth                    | berth deck              | betting shop            | bicycle racks            |
| bindery                  | biology laboratory      | indoor bistro           | indoor bleachers         |
| indoor bomb shelter      | bookbindery             | bookstore               | indoor booth             |
| indoor bow window        | bowling alley           | box seat                | boxing ring              |
| breakroom                | indoor brewery          | indoor brickyard        | burial chamber           |
| indoor bus depot         | bus interior            | indoor bus station      | butchers shop            |
| indoor cabin             | cafeteria               | call center             | candy store              |
| canteen                  | backseat car interior   | frontseat car interior  | cardroom                 |
| cargo container interior | indoor carport          | indoor casino           | catacomb                 |
| indoor cathedral         | catwalk                 | chapel                  | checkout counter         |
| cheese factory           | chemistry lab           | indoor chicken coop     | indoor chicken farm      |
| childs room              | interior choir loft     | indoor church           | indoor circus tent       |
| classroom                | clean room              | indoor clock tower      | indoor cloister          |
| closet                   | clothing store          | cockpit                 | coffee shop              |
| computer room            | conference center       | conference hall         | conference room          |
| confessional             | control room            | indoor control tower    | indoor convenience store |
| corridor                 | courtroom               | interior covered bridge | crawl space              |
| cybercafe                | indoor dairy            | dance school            | darkroom                 |
| day care center          | delicatessen            | dentists office         | department store         |
| departure lounge         | indoor diner            | dining car              | dining hall              |
| dining room              | discotheque             | distillery              | indoor doorway           |
| dorm room                | dress shop              | dressing room           | indoor driving range     |
| drugstore                | editing room            | electrical room         | elevated catwalk         |
| interior elevator        | elevator lobby          | elevator shaft          | engine room              |
| entrance hall            | indoor escalator        | exhibition hall         | fabric store             |
| indoor factory           | fastfood restaurant     | indoor ferryboat        | indoor firing range      |
| fishmarket               | interior fitting room   | indoor flea market      | indoor florist shop      |
| food court               | indoor foundry          | funeral chapel          | funeral home             |
| furnace room             | galley                  | game room               | indoor garage            |
| indoor general store     | indoor geodesic dome    | gift shop               | great hall               |
| indoor greenhouse        | indoor gun deck         | gun store               | indoor gymnasium         |
| hallway                  | indoor hangar           | hardware store          | hat shop                 |
| hatchery                 | hatchway                | hayloft                 | hearth                   |
| home office              | home theater            | hospital room           | indoor hot tub           |
| hotel breakfast area     | hotel room              | indoor hunting lodge    | ice cream parlor         |
| indoor ice skating rink  | indoor incinerator      | indoor inn              | indoor jacuzzi           |
| indoor jail              | jail cell               | jewelry shop            | jury box                 |
| indoor kennel            | kindergarden classroom  | indoor kiosk            | kitchen                  |
| kitchenette              | lab classroom           | indoor labyrinth        | landing                  |

|                                 |                             |                              |                                 |
|---------------------------------|-----------------------------|------------------------------|---------------------------------|
| laundromat                      | lavatory                    | lecture room                 | legislative chamber             |
| indoor library                  | indoor lido deck            | limousine interior           | indoor liquor store             |
| living room                     | lobby                       | locker room                  | loft                            |
| indoor lookout station          | indoor lumberyard           | machine shop                 | indoor market                   |
| martial arts gym                | maternity ward              | mess hall                    | mezzanine                       |
| military hospital               | mill                        | mine                         | indoor mini golf course         |
| indoor monastery                | morgue                      | indoor mosque                | indoor movie theater            |
| indoor museum                   | music store                 | music studio                 | natural history museum          |
| newsroom                        | indoor newsstand            | nightclub                    | indoor nuclear power plant      |
| nursery                         | nursing home                | indoor observatory           | office                          |
| office cubicles                 | indoor oil refinery         | operating room               | optician                        |
| orchestra pit                   | interior organ loft         | orlop deck                   | ossuary                         |
| indoor outhouse                 | oyster bar                  | packaging plant              | palace hall                     |
| pantry                          | paper mill                  | indoor parking garage        | parlor                          |
| particle accelerator            | indoor party tent           | pawnshop                     | penalty box                     |
| perfume shop                    | pet shop                    | pharmacy                     | physics laboratory              |
| piano store                     | pig farm                    | indoor pilothouse            | pizzeria                        |
| indoor planetarium              | playroom                    | indoor podium                | portrait studio                 |
| indoor power plant              | print shop                  | promenade deck               | indoor pub                      |
| pulpit                          | pump room                   | indoor quonset hut           | reading room                    |
| reception                       | recreation room             | indoor recycling plant       | refectory                       |
| repair shop                     | restaurant                  | restaurant kitchen           | indoor restroom                 |
| revolving door                  | riding arena                | indoor roller skating rink   | rolling mill                    |
| sacristy                        | sauna                       | sawmill                      | science museum                  |
| scriptorium                     | security check point        | server room                  | sewer                           |
| sewing room                     | shipping room               | indoor shipyard              | shoe shop                       |
| indoor shopping mall            | shower                      | shower room                  | shrine                          |
| indoor skywalk                  | sporting goods store        | squash court                 | stable                          |
| indoor stage                    | staircase                   | indoor steam plant           | indoor steel mill               |
| storage room                    | storeroom food              | submarine interior           | subway interior                 |
| supermarket                     | sushi bar                   | indoor swimming pool         | indoor synagogue                |
| tearoom                         | teashop                     | television room              | television studio               |
| indoor tennis court             | indoor tent                 | textile mill                 | indoor procenium theater        |
| indoor round theater            | indoor seats theater        | thriftshop                   | throne room                     |
| ticket booth                    | indoor ticket window        | indoor tobacco shop          | toyshop                         |
| indoor track                    | trading floor               | train interior               | rail indoor tunnel              |
| road indoor tunnel              | turkish bath                | utility room                 | utility tunnel                  |
| van interior                    | indoor velodrome            | ventilation shaft            | vestry                          |
| veterinarians office            | videostore                  | indoor volleyball court      | voting booth                    |
| waiting room                    | walk in freezer             | indoor warehouse             | indoor washhouse                |
| indoor water treatment plant    | wet bar                     | whispering gallery           | wig shop                        |
| window seat                     | winery                      | witness stand                | workroom                        |
| workshop                        | indoor wrestling ring       | youth hostel                 | basketball arena                |
| football arena                  | hockey arena                | performance arena            | rodeo arena                     |
| soccer arena                    | home atrium                 | public atrium                | bakery kitchen                  |
| bakery shop                     | airplane cargo deck         | choir loft                   | cloakroom booth                 |
| cloakroom                       | library cubicle             | office cubicle               | home dinette                    |
| vehicle dinette                 | elevator door               | freight elevator             | ferryboat cargo deck            |
| fitting room                    | organ loft                  | establishment poolroom       | home poolroom                   |
| spa massage room                | spa mineral bath            | corridor in a subway station | platform in a subway station    |
| turnstiles in a subway station  | platform in a train station | station in a train station   | barrel storage in a wine cellar |
| bottle storage in a wine cellar |                             |                              |                                 |

## References

- [1] Andrew. 106 styles for stable diffusion xl model. <https://stable-diffusion-art.com/sdxl-styles>. 6
- [2] Matthew Baugh. PIE-torch. <https://github.com/matt-baugh/pytorch-poisson-image-editing>. 3
- [3] Ainaz Eftekhari, Alexander Sax, Jitendra Malik, and Amir Zamir. Omnidata: A scalable pipeline for making multi-task mid-level vision datasets from 3d scans. In *ICCV*, 2021. 1
- [4] Eric Heitz, Laurent Belcour, and Thomas Chambon. Iterative  $\alpha$ -(de)blending: A minimalist deterministic diffusion model. In *ACM SIGGRAPH*, 2023. 2, 3
- [5] Xun Huang and Serge Belongie. Arbitrary style transfer in real-time with adaptive instance normalization. In *ICCV*, 2017. 4
- [6] Bingxin Ke, Anton Obukhov, Shengyu Huang, Nando Metzger, Rodrigo Caye Daudt, and Konrad Schindler. Repurposing diffusion-based image generators for monocular depth estimation. In *CVPR*, 2024. 1
- [7] Junnan Li, Dongxu Li, Silvio Savarese, and Steven Hoi. BLIP-2: Bootstrapping language-image pre-training with frozen image encoders and large language models. In *ICML*, 2023. 1, 2
- [8] Yijun Li, Chen Fang, Jimei Yang, Zhaowen Wang, Xin Lu, and Ming-Hsuan Yang. Universal style transfer via feature transforms. In *NeurIPS*, 2017. 4
- [9] Taesung Park, Ming-Yu Liu, Ting-Chun Wang, and Jun-Yan Zhu. Semantic image synthesis with spatially-adaptive normalization. In *CVPR*, 2019. 1
- [10] Gaurav Parmar, Krishna Kumar Singh, Richard Zhang, Yijun Li, Jingwan Lu, and Jun-Yan Zhu. Zero-shot image-to-image translation. In *ACM SIGGRAPH*, 2023. 6
- [11] Patrick Pérez, Michel Gangnet, and Andrew Blake. Poisson image editing. *ACM TOG*, 2003. 3
- [12] René Ranftl, Alexey Bochkovskiy, and Vladlen Koltun. Vision transformers for dense prediction. In *ICCV*, 2021. 1
- [13] R. Ranftl, K. Lasinger, D. Hafner, K. Schindler, and V. Koltun. Towards robust monocular depth estimation: Mixing datasets for zero-shot cross-dataset transfer. *IEEE TPAMI*, 44(03):1623–1637, 2022. 1, 6
- [14] Mike Roberts, Jason Ramapuram, Anurag Ranjan, Atulit Kumar, Miguel Angel Bautista, Nathan Paczan, Russ Webb, and Joshua M. Susskind. Hypersim: A photorealistic synthetic dataset for holistic indoor scene understanding. In *ICCV*, 2021. 2
- [15] Chitwan Saharia, William Chan, Huiwen Chang, Chris Lee, Jonathan Ho, Tim Salimans, David Fleet, and Mohammad Norouzi. Palette: Image-to-image diffusion models. In *ACM SIGGRAPH*, 2022. 3, 4
- [16] Tim Salimans and Jonathan Ho. Progressive distillation for fast sampling of diffusion models. In *ICLR*, 2022. 1
- [17] Meng-Li Shih, Shih-Yang Su, Johannes Kopf, and Jia-Bin Huang. 3d photography using context-aware layered depth inpainting. In *CVPR*, 2020. 6
- [18] Nathan Silberman, Derek Hoiem, Pushmeet Kohli, and Rob Fergus. Indoor segmentation and support inference from rgb-d images. In *ECCV*, 2012. 1, 2
- [19] Narek Tumanyan, Michal Geyer, Shai Bagon, and Tali Dekel. Plug-and-play diffusion features for text-driven image-to-image translation. In *CVPR*, 2023. 5
- [20] Xinlong Wang, Wen Wang, Yue Cao, Chunhua Shen, and Tiejun Huang. Images speak in images: A generalist painter for in-context visual learning. In *CVPR*, 2023. 1
- [21] Lvmin Zhang, Anyi Rao, and Maneesh Agrawala. Adding conditional control to text-to-image diffusion models. In *ICCV*, 2023. 3, 4
- [22] Bolei Zhou, Hang Zhao, Xavier Puig, Sanja Fidler, Adela Barriuso, and Antonio Torralba. Scene parsing through ade20k dataset. In *CVPR*, 2017. 1, 2
